# Supplementary material
Source: Springer Nature journal article supplement (http://www.springermedizin.de/resource/supplementary/12937_2014_790_MOESM4_ESM.pdf/25654072)

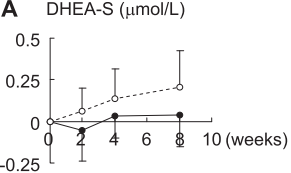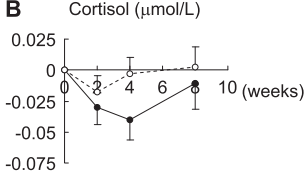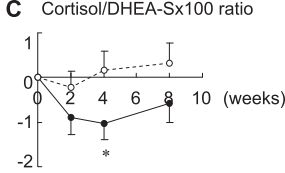

Supplement: MOESM4 [file 25654072]
